# Supplementary material
Source: ML conference proceedings conference paper supplement (https://openreview.net/forum?id=cGiBYjBFiY)
Supplement: supplementary_material [file NeurIPS_Appendix.pdf › Appendix/NeurIPS_Appendix.pdf]

## 1. Appendix

### 1.1. Training curves

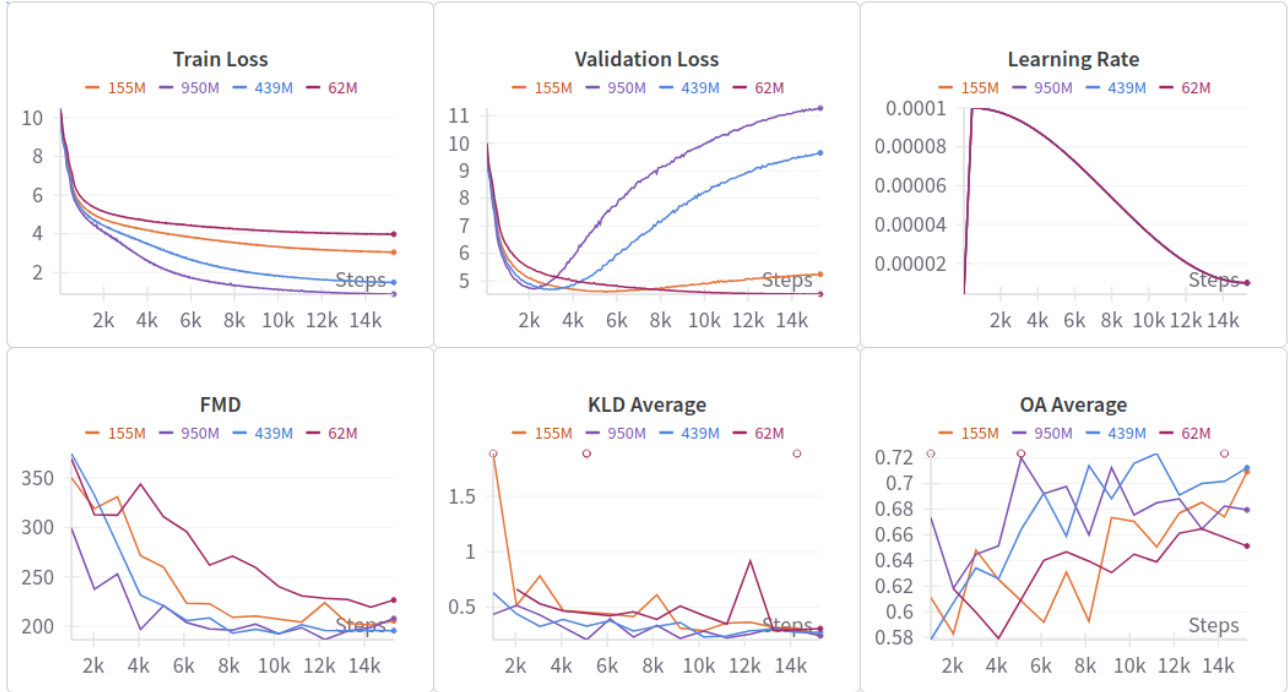

Figure 1. Training curves for the MAESTRO models of different sizes.

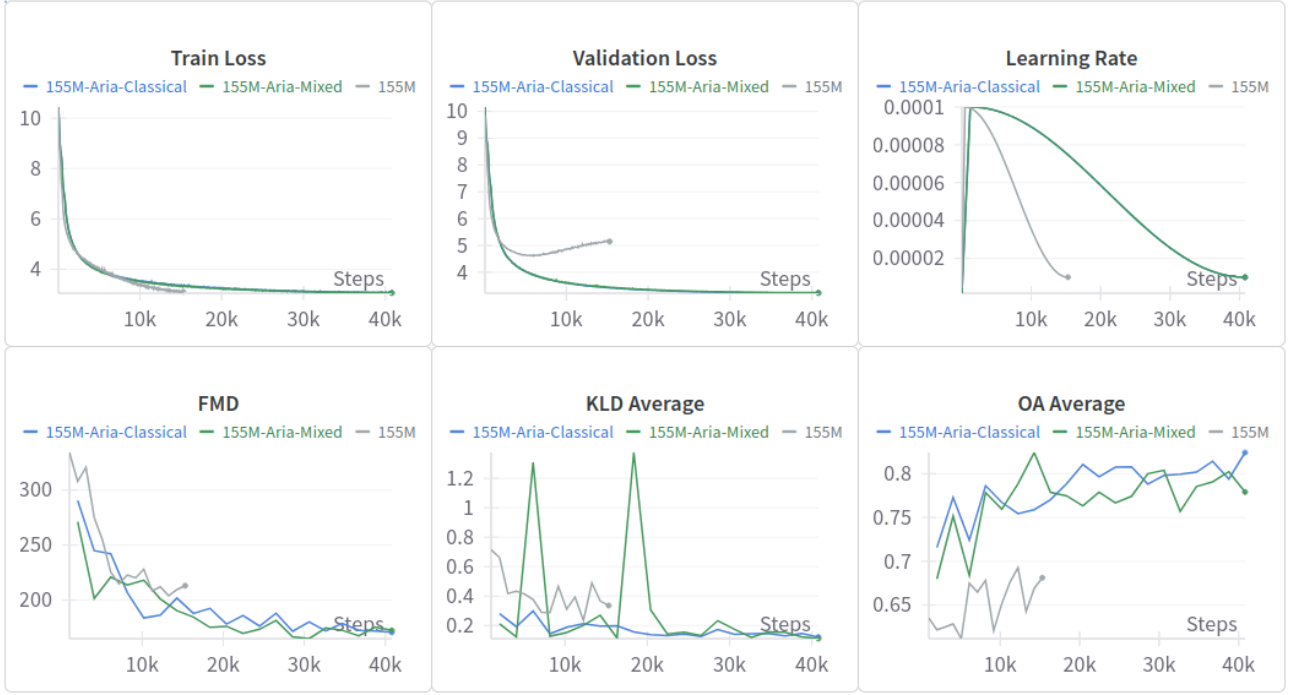

Figure 2. Training curves for the models pre-trained on Aria-Deduped compared to the 155M model trained only on MAESTRO.

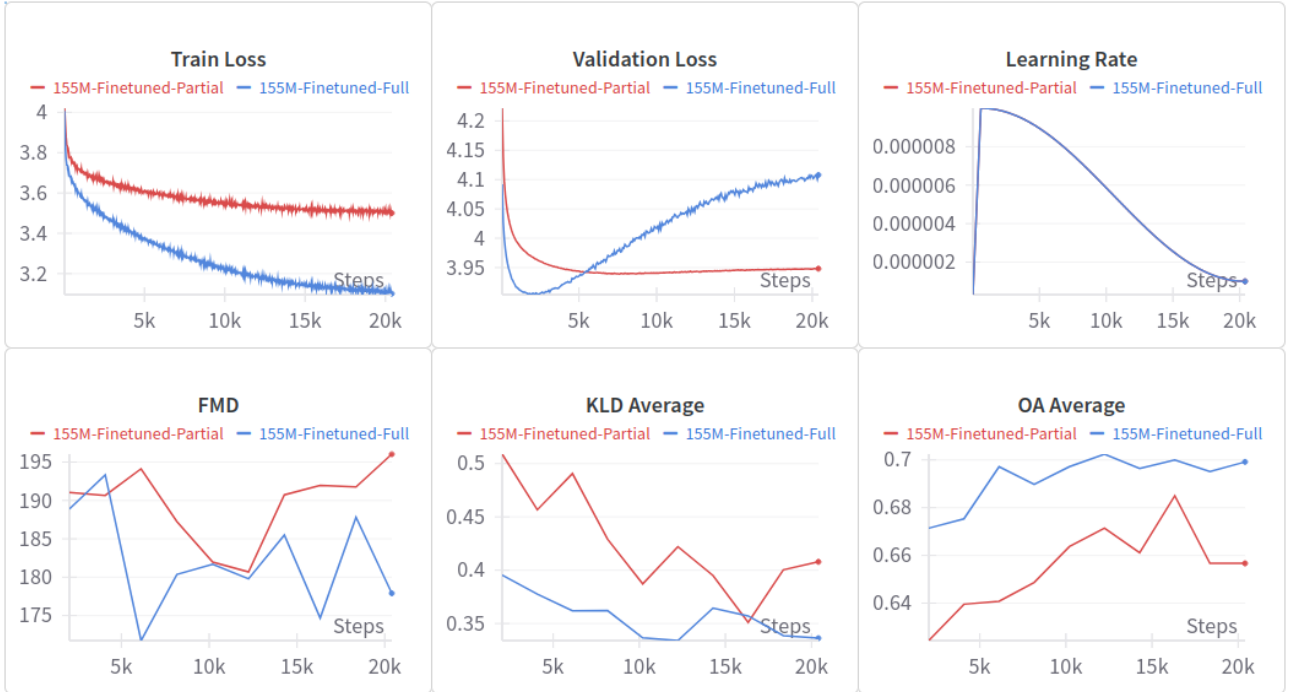

Figure 3. Training curves for the models pre-trained on Aria-Deduped and fine-tuned on MAESTRO.

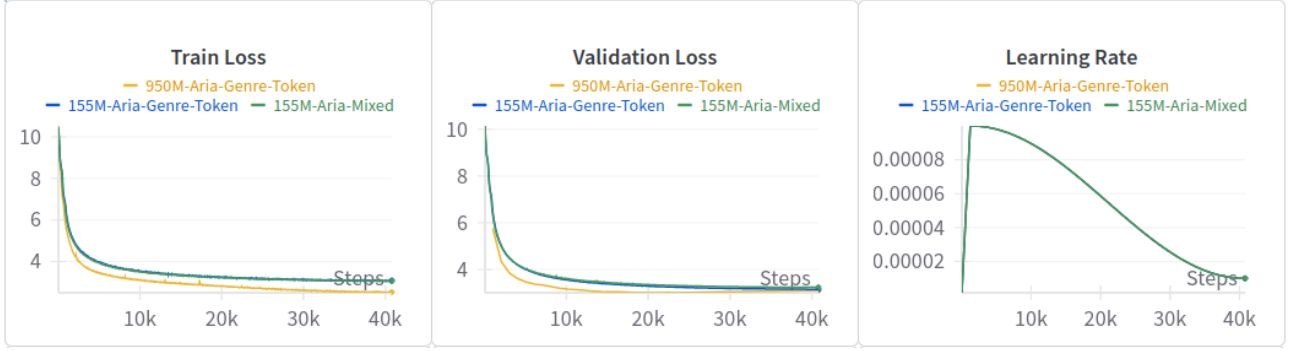

Figure 4. Training curves for the models with integrated genre information.

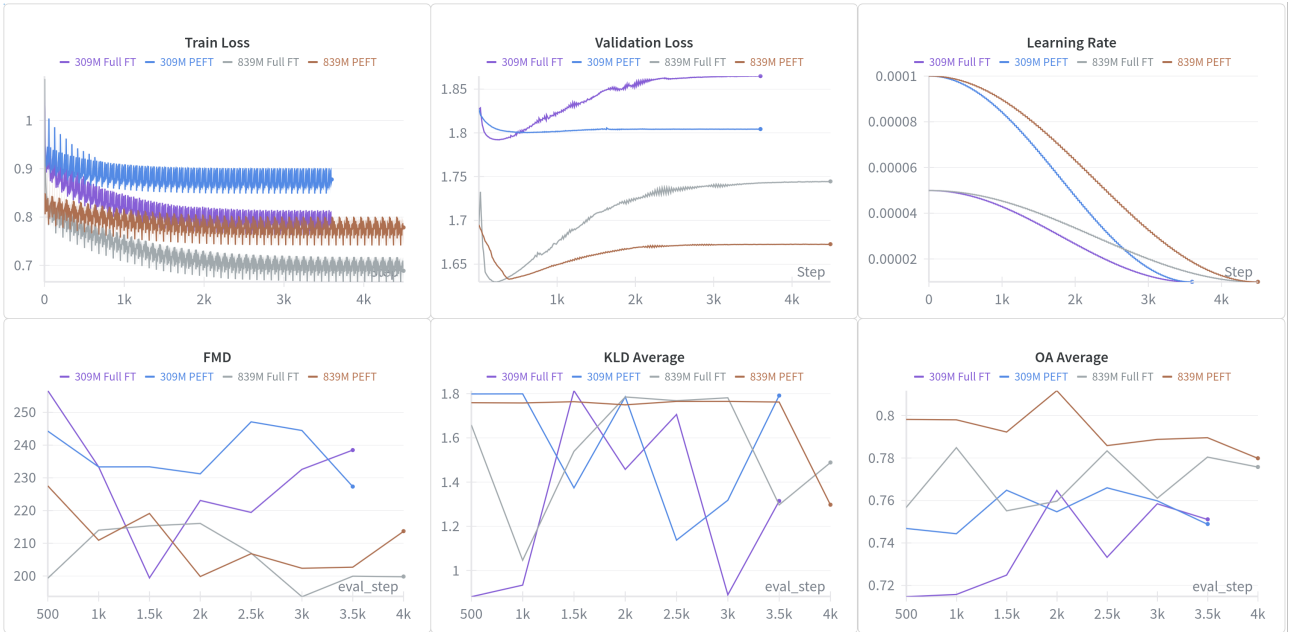

Figure 5. Fine-tuning curves for Moonbeam with context size 512.

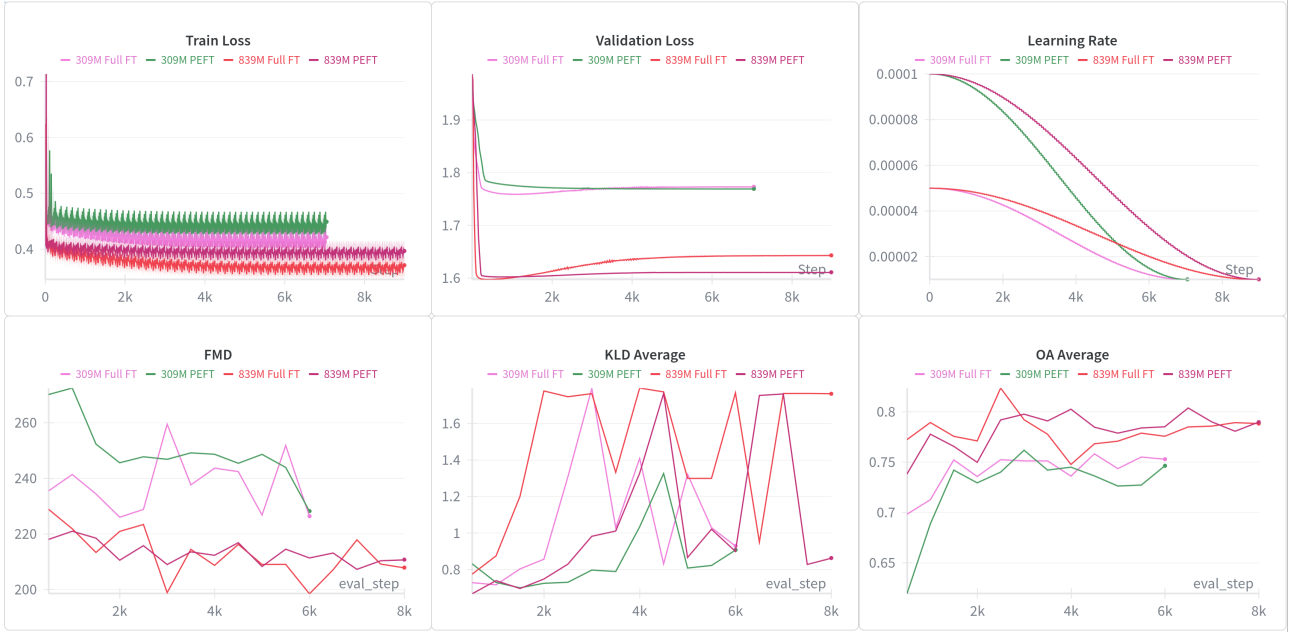

Figure 6. Fine-tuning curves for Moonbeam with context size 1024.

## 1.2. Musical Turing-like rest analysis results

Table 8. Precision, Recall, and F1-Scores for the musical Turing-like test.  
“Unsure” responses were considered as incorrect.

| Class     | Precision | Recall | F1-score |
|-----------|-----------|--------|----------|
| Human     | 62.16%    | 55.20% | 58.47%   |
| Generated | 60.19%    | 52.00% | 55.79%   |

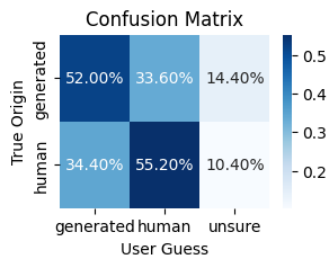

Figure 7. Confusion Matrix for the musical Turing-like test.

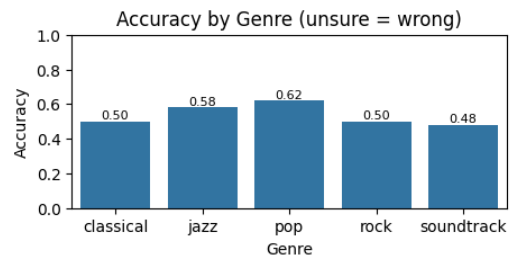

Figure 8. Accuracy by genre in the musical Turing-like test.

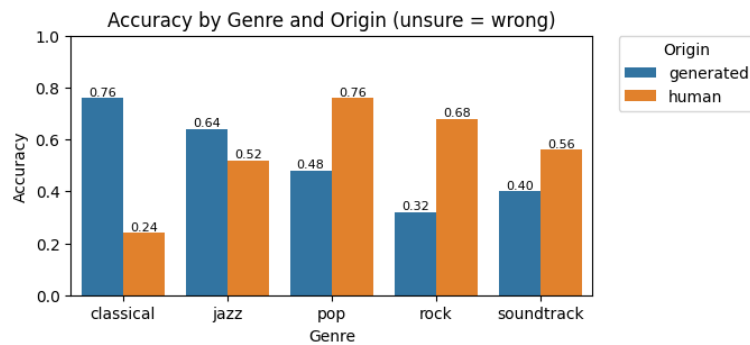

Figure 9. Accuracy by genre and origin in the musical Turing-like test.

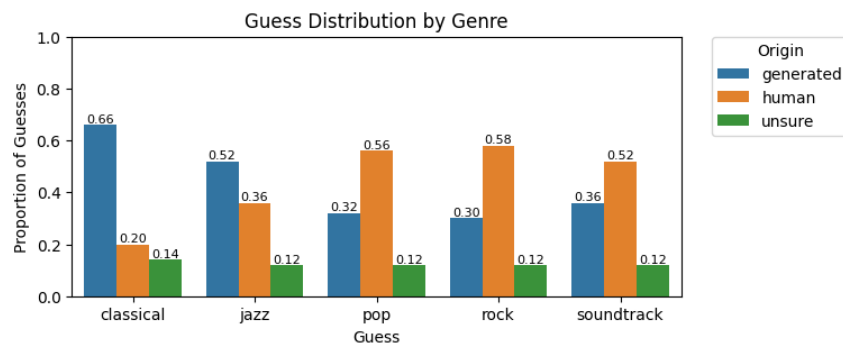

Figure 10. Distribution of participant guesses by genre in the musical Turing-like test.

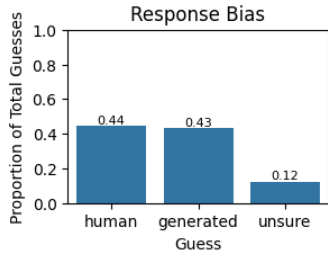

Figure 11. Overall response bias in the musical Turing-like test.

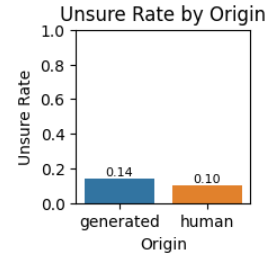

Figure 12. Unsure rate by origin in the musical Turing-like test.

## 2. Full Evaluation Tables

| Model                         | 62M    |        | 155M   |        | 439M   |        | 950M   |        | MAESTRO |       |
|-------------------------------|--------|--------|--------|--------|--------|--------|--------|--------|---------|-------|
| Subjective Evaluation         |        |        |        |        |        |        |        |        |         |       |
| Pleasingness                  | 2.85   |        | 2.89   |        | 3.30   |        | 3.27   |        |         |       |
| Authenticity                  | 2.78   |        | 2.66   |        | 3.02   |        | 2.98   |        |         |       |
| Novelty                       | 2.89   |        | 3.03   |        | 3.35   |        | 3.27   |        |         |       |
| Average                       | 2.84   |        | 2.86   |        | 3.22   |        | 3.17   |        |         |       |
| Absolute Evaluation           |        |        |        |        |        |        |        |        |         |       |
|                               | Mean   | Std    | Mean   | Std    | Mean   | Std    | Mean   | Std    | Mean    | Std   |
| total_used_pitch              | 38.15  | 9.24   | 42.09  | 9.07   | 43.99  | 8.45   | 42.73  | 8.77   | 54.90   | 9.82  |
| pitch_range                   | 51.39  | 11.05  | 54.24  | 10.17  | 53.19  | 9.53   | 52.61  | 10.09  | 63.17   | 9.23  |
| avg_pitch_shift               | 9.36   | 4.25   | 9.88   | 3.51   | 11.05  | 3.31   | 10.67  | 3.82   | 12.35   | 2.79  |
| total_used_note               | 476.18 | 99.74  | 497.79 | 96.82  | 518.03 | 72.06  | 514.75 | 73.43  | 609.97  | 51.24 |
| avg_IOI                       | 0.15   | 0.10   | 0.13   | 0.09   | 0.14   | 0.10   | 0.14   | 0.09   | 0.09    | 0.05  |
| Average Distance to MAESTRO   | 0.33   | 10.48  | 0.25   | 9.61   | 0.23   | 4.61   | 0.25   | 5.04   | 0.00    | 0.00  |
| Relative Evaluation           |        |        |        |        |        |        |        |        |         |       |
|                               | KLD    | OA     | KLD    | OA     | KLD    | OA     | KLD    | OA     |         |       |
| total_used_pitch              | 0.03   | 71.63% | 0.03   | 81.79% | 0.01   | 86.46% | 0.03   | 82.64% |         |       |
| total_pitch_class_hist        | 0.20   | 75.52% | 0.61   | 80.20% | 0.01   | 88.03% | 0.02   | 86.38% |         |       |
| pitch_range                   | 0.01   | 78.90% | 0.13   | 85.96% | 0.01   | 83.63% | 0.02   | 81.62% |         |       |
| avg_pitch_shift               | 0.05   | 76.91% | 0.00   | 86.25% | 0.00   | 93.18% | 0.01   | 87.74% |         |       |
| total_used_note               | 1.74   | 22.36% | 1.35   | 27.13% | 1.20   | 30.02% | 1.20   | 30.92% |         |       |
| avg_IOI                       | 0.03   | 77.42% | 0.16   | 83.25% | 0.09   | 81.00% | 0.08   | 79.32% |         |       |
| note_length_hist              | 0.49   | 45.21% | 0.44   | 47.20% | 0.41   | 50.66% | 0.58   | 44.08% |         |       |
| note_length_transition_matrix | 0.30   | 54.81% | 0.30   | 55.90% | 0.26   | 59.83% | 0.37   | 53.94% |         |       |
| Average                       | 0.36   | 62.85% | 0.38   | 68.46% | 0.25   | 71.60% | 0.29   | 68.33% |         |       |
| FMD                           | 210.01 |        | 187.53 |        | 176.40 |        | 176.38 |        |         |       |
| Perplexity                    | 53.65  |        | 21.32  |        | 4.82   |        | 2.78   |        |         |       |

Table 9. Subjective and objective evaluations of models trained on MAESTRO.

| Model                         | 155M   |        | 155M-A-M |        | 155M-A-C |        | MAESTRO |       |
|-------------------------------|--------|--------|----------|--------|----------|--------|---------|-------|
| Subjective Evaluation         |        |        |          |        |          |        |         |       |
| Pleasingness                  | 2.80   |        |          |        | 3.25     |        |         |       |
| Authenticity                  | 2.80   |        |          |        | 3.03     |        |         |       |
| Novelty                       | 2.95   |        |          |        | 3.25     |        |         |       |
| Average                       | 2.85   |        |          |        | 3.18     |        |         |       |
| Absolute Evaluation           |        |        |          |        |          |        |         |       |
|                               | Mean   | Std    | Mean     | Std    | Mean     | Std    | Mean    | Std   |
| total_used_pitch              | 42.09  | 9.07   | 30.11    | 8.64   | 32.39    | 10.67  | 54.90   | 9.82  |
| pitch_range                   | 54.24  | 10.17  | 48.93    | 11.54  | 50.34    | 12.01  | 63.17   | 9.23  |
| avg_pitch_shift               | 9.88   | 3.51   | 9.71     | 3.02   | 10.18    | 3.32   | 12.35   | 2.79  |
| total_used_note               | 497.79 | 96.82  | 436.02   | 96.08  | 431.72   | 130.27 | 609.97  | 51.24 |
| avg_IOI                       | 0.13   | 0.09   | 0.27     | 0.18   | 0.25     | 0.34   | 0.09    | 0.05  |
| Average Distance to MAESTRO   | 0.25   | 9.61   | 0.65     | 9.74   | 0.58     | 16.70  | 0.00    | 0.00  |
| Relative Evaluation           |        |        |          |        |          |        |         |       |
|                               | KLD    | OA     | KLD      | OA     | KLD      | OA     |         |       |
| total_used_pitch              | 0.03   | 81.79% | 0.66     | 52.09% | 0.53     | 56.25% |         |       |
| total_pitch_class_hist        | 0.61   | 80.20% | 0.25     | 70.96% | 0.29     | 68.59% |         |       |
| pitch_range                   | 0.13   | 85.96% | 0.20     | 71.89% | 0.19     | 73.49% |         |       |
| avg_pitch_shift               | 0.00   | 86.25% | 0.06     | 85.88% | 0.03     | 89.43% |         |       |
| total_used_note               | 1.35   | 27.13% | 2.28     | 24.10% | 2.65     | 15.64% |         |       |
| avg_IOI                       | 0.16   | 83.25% | 0.65     | 51.63% | 0.66     | 49.49% |         |       |
| note_length_hist              | 0.44   | 47.20% | 1.48     | 41.16% | 1.21     | 40.00% |         |       |
| note_length_transition_matrix | 0.30   | 55.90% | 0.97     | 50.29% | 0.87     | 49.21% |         |       |
| Average                       | 0.38   | 68.46% | 0.82     | 56.00% | 0.80     | 55.26% |         |       |
| FMD                           | 187.53 |        | 292.46   |        | 249.84   |        |         |       |

Table 10. Subjective and objective evaluation of models pre-trained on Aria-Deduped compared with the 155M MAESTRO model.

| Model                         | 155M   |        | 155M-F-P |        | 155M-F-F |        | MAESTRO |       |
|-------------------------------|--------|--------|----------|--------|----------|--------|---------|-------|
| Subjective Evaluation         |        |        |          |        |          |        |         |       |
| Pleasingness                  | 2.80   |        | 3.13     |        | 3.30     |        |         |       |
| Authenticity                  | 2.80   |        | 2.95     |        | 3.10     |        |         |       |
| Novelty                       | 2.95   |        | 3.20     |        | 3.35     |        |         |       |
| Average                       | 2.85   |        | 3.09     |        | 3.25     |        |         |       |
| Absolute Evaluation           |        |        |          |        |          |        |         |       |
|                               | Mean   | Std    | Mean     | Std    | Mean     | Std    | Mean    | Std   |
| total_used_pitch              | 42.09  | 9.07   | 41.78    | 8.89   | 41.41    | 8.08   | 54.90   | 9.82  |
| pitch_range                   | 54.24  | 10.17  | 55.63    | 9.71   | 56.61    | 10.09  | 63.17   | 9.23  |
| avg_pitch_shift               | 9.88   | 3.51   | 11.30    | 3.56   | 10.48    | 3.59   | 12.35   | 2.79  |
| total_used_note               | 497.79 | 96.82  | 514.01   | 77.59  | 521.21   | 57.95  | 609.97  | 51.24 |
| avg_IOI                       | 0.13   | 0.09   | 0.12     | 0.08   | 0.11     | 0.07   | 0.09    | 0.05  |
| Average Distance to MAESTRO   | 0.25   | 9.61   | 0.19     | 5.71   | 0.18     | 2.03   | 0.00    | 0.00  |
| Relative Evaluation           |        |        |          |        |          |        |         |       |
|                               | KLD    | OA     | KLD      | OA     | KLD      | OA     |         |       |
| total_used_pitch              | 0.03   | 81.79% | 0.09     | 80.45% | 0.09     | 80.98% |         |       |
| total_pitch_class_hist        | 0.61   | 80.20% | 0.14     | 78.01% | 0.17     | 75.66% |         |       |
| pitch_range                   | 0.13   | 85.96% | 0.02     | 88.78% | 0.02     | 89.58% |         |       |
| avg_pitch_shift               | 0.00   | 86.25% | 0.04     | 88.44% | 0.06     | 84.66% |         |       |
| total_used_note               | 1.35   | 27.13% | 1.30     | 30.39% | 1.12     | 32.05% |         |       |
| avg_IOI                       | 0.16   | 83.25% | 0.02     | 90.27% | 0.03     | 90.51% |         |       |
| note_length_hist              | 0.44   | 47.20% | 0.62     | 52.51% | 0.50     | 59.45% |         |       |
| note_length_transition_matrix | 0.30   | 55.90% | 0.46     | 60.06% | 0.36     | 66.20% |         |       |
| Average                       | 0.38   | 68.46% | 0.34     | 70.93% | 0.30     | 72.39% |         |       |
| FMD                           | 187.53 |        | 193.45   |        | 187.34   |        |         |       |

Table 11. Subjective and objective evaluation of models pre-trained on Aria-Deduped and fine-tuned on MAESTRO compared with the 155M MAESTRO model.
